# Supplementary material
Source: MDPI journal article supplement (https://www.mdpi.com/2311-7524/7/10/400)
Supplement: s1 [file s1]

## SUPPLEMENTARY MATERIAL

Table S1. HPLC and HPLC-MS operating conditions for sugars, organic acids and phenolic compounds.

| HPLC conditions[7,40] |                                         |                                                              |                                         |                                                                                                                              |
|-----------------------|-----------------------------------------|--------------------------------------------------------------|-----------------------------------------|------------------------------------------------------------------------------------------------------------------------------|
|                       | Organic acids                           | Sugars                                                       | Ascorbic acid                           | Phenolics                                                                                                                    |
| Recorded spectra      | 210 nm                                  | /                                                            | 245 nm                                  | 200-600 nm                                                                                                                   |
| Detector              | UV detector                             | Refractive index detector (RI)                               | UV detector                             | Diode array detector (DAD)                                                                                                   |
| Column                | Rezex ROA H+ (8%); Phenomenex           | Rezex RXM-monosaccharide CA (+2%); Phenomenex                | Rezex ROA H+ (8%); Phenomenex           | Gemini C18 (150x4,6mm;3µm); Phenomenex                                                                                       |
| Column temperature    | 65°C                                    | 65°C                                                         | 20°C                                    | 25°C                                                                                                                         |
| Injection             | 20 µl                                   | 20 µl                                                        | 20 µl                                   | 20 µl                                                                                                                        |
| Flow rate             | 0.6 ml/min                              | 0.6 ml/min                                                   | 0.6 ml/min                              | 0.6 ml/min                                                                                                                   |
| Total run time        | 30 min                                  | 30 min                                                       | 30 min                                  | 50 min                                                                                                                       |
| Mobile phase          | 4 mM sulfuric acid<br>Isocratic elution | Bidistilled water<br>Isocratic elution                       | 4 mM sulfuric acid<br>Isocratic elution | A: 0.1%formic acid + 3% acetonitrile + 97% biH <sub>2</sub> O; B: 0.1%formic acid + 3% biH <sub>2</sub> O + 97% acetonitrile |
|                       | MS conditions[7]                        | Gradient elution of mobile phases for phenolic compounds [7] |                                         |                                                                                                                              |
| Full scan (m/z)       | 115-1500                                | Time (min)                                                   | A (%)                                   | B (%)                                                                                                                        |
| Injection volume      | 10 µl                                   | 0                                                            | 95                                      | 5                                                                                                                            |
| Flow rate             | 0.6 ml/min                              | 15                                                           | 80                                      | 20                                                                                                                           |
| Capillary temperature | 320°C                                   | 20                                                           | 70                                      | 30                                                                                                                           |
| Sheat-Aux-Sweep Gas   | 50 – 20 – 0 arb                         | 25                                                           | 70                                      | 30                                                                                                                           |
| Spray Voltage (kV)    | 3.5                                     | 30                                                           | 10                                      | 90                                                                                                                           |
| Capillary voltage (V) | 10                                      | 35                                                           | 0                                       | 100                                                                                                                          |
|                       |                                         | 45                                                           | 95                                      | 5                                                                                                                            |
|                       |                                         | 50                                                           | 95                                      | 5                                                                                                                            |

Table S2: Content of Identified Hydroxycinnamic Acid Derivatives (mg/kg FW) in Salicylic Acid (SA), Methyl Salicylic Acid (MeSA) and Acetyl Salicylic Acid (ASA) Treated Strawberries at Different Time Points (T0, 24h, 72h, 7 days and 10 days after treatments with salicylates).

|         | Treatment | Caffeic acid der | Cinamoyl hex     | Chlorogenic acid | <i>p</i> -coumaric acid hex | Total hydroxycinnamic acid derivatives |
|---------|-----------|------------------|------------------|------------------|-----------------------------|----------------------------------------|
| T0      | C         | 10.53 ± 0.25 a   | 152.49 ± 6.99 a  | 9.93 ± 0.24 a    | 1.45 ± 0.12 a               | 174.39 ± 6.72 a                        |
|         | SA        | 10.22 ± 0.24 a   | 163.50 ± 12.09 a | 9.59 ± 0.15 a    | 1.50 ± 0.09 a               | 184.80 ± 12.15 a                       |
|         | MeSA      | 10.60 ± 0.28 a   | 164.13 ± 8.37 a  | 9.43 ± 0.78 a    | 1.38 ± 0.15 a               | 185.55 ± 8.88 a                        |
|         | ASA       | 10.03 ± 0.30 a   | 159.00 ± 3.81 a  | 10.06 ± 0.73 a   | 1.62 ± 0.18 a               | 180.72 ± 4.26 a                        |
| 24 h    | C         | 10.18 ± 0.33 a   | 163.38 ± 1.77 a  | 9.75 ± 0.834 a   | 1.29 ± 0.09 a               | 184.59 ± 1.74 a                        |
|         | SA        | 12.48 ± 0.18 b   | 188.58 ± 1.41 b  | 13.26 ± 0.54 b   | 1.41 ± 0.09 a               | 215.76 ± 1.77 c                        |
|         | MeSA      | 13.02 ± 0.33 b   | 170.19 ± 1.95 a  | 13.53 ± 0.66 b   | 1.26 ± 0.09 a               | 197.97 ± 2.55 b                        |
|         | ASA       | 9.99 ± 0.27 a    | 165.99 ± 2.01 a  | 10.53 ± 0.96 ab  | 1.14 ± 0.09 a               | 185.22 ± 1.62 a                        |
| 72 h    | C         | 12.42 ± 1.02 a   | 193.68 ± 7.20 a  | 12.99 ± 0.45 a   | 1.44 ± 0.09 a               | 220.53 ± 6.51 a                        |
|         | SA        | 12.96 ± 0.45 a   | 223.11 ± 7.92 a  | 15.36 ± 0.27 a   | 1.74 ± 0.06 a               | 253.17 ± 7.92 b                        |
|         | MeSA      | 13.41 ± 0.30 a   | 221.10 ± 5.61 a  | 14.37 ± 0.90 a   | 1.74 ± 0.09 a               | 250.65 ± 5.73 ab                       |
|         | ASA       | 12.09 ± 0.42 a   | 209.70 ± 9.24 a  | 13.14 ± 0.90 a   | 1.56 ± 0.12 a               | 236.49 ± 9.78 ab                       |
| 7 days  | C         | 17.79 ± 1.32 ab  | 217.50 ± 14.40 a | 18.09 ± 0.48 a   | 1.80 ± 0.15 a               | 255.18 ± 13.92 a                       |
|         | SA        | 20.61 ± 0.93 b   | 259.53 ± 6.75 b  | 19.56 ± 1.44 a   | 2.04 ± 0.15 a               | 301.71 ± 5.73 b                        |
|         | MeSA      | 15.27 ± 0.30 a   | 194.07 ± 7.59 a  | 18.03 ± 0.24 a   | 1.80 ± 0.09 a               | 229.17 ± 7.56 a                        |
|         | ASA       | 16.83 ± 0.69 a   | 205.14 ± 7.83 a  | 18.60 ± 0.36 a   | 1.98 ± 0.18 a               | 242.55 ± 7.35 a                        |
| 10 days | C         | 17.46 ± 0.69 a   | 186.66 ± 5.43 a  | 21.00 ± 1.77 a   | 2.19 ± 0.33 a               | 227.34 ± 4.50 a                        |
|         | SA        | 17.28 ± 1.17 a   | 195.18 ± 9.93 a  | 21.39 ± 0.81 a   | 1.65 ± 0.12 a               | 235.47 ± 9.99 a                        |
|         | MeSA      | 17.49 ± 0.87 a   | 196.62 ± 6.42 a  | 23.49 ± 0.42 a   | 2.01 ± 0.15 a               | 239.61 ± 6.42 a                        |
|         | ASA       | 19.14 ± 0.69 a   | 188.94 ± 6.54 a  | 20.58 ± 0.60 a   | 1.62 ± 0.15 a               | 230.25 ± 7.20 a                        |

Abbreviations: SA-salicylic acid, MeSA-methyl salicylic acid, ASA-acetyl salicylic acid, C-control, h-hours, der-derivative, hex-hexoside. Data are presented as average value ± standard error (n = 15). <sup>a</sup>Different letters in a table denote significant differences among treatments (C, SA, MeSA, ASA) at each time point, calculated by the Tukey test ( $p < 0.05$ ). <sup>b</sup> Sum of all identified hydroxycinnamic acid derivatives in strawberries.

Table S3: Content of Identified Flavanols (mg/kg FW) in C, SA, MeSA and ASA Treated Strawberries at Different Time Points (T0, 24 h, 72 h, 7 days and 10 days after treatments with salicylates).<sup>a</sup>

|         | Treatment | Procyanidin dimer 1 | Procyanidin dimer 2 | Catechin          | Total flavanols <sup>b</sup> |
|---------|-----------|---------------------|---------------------|-------------------|------------------------------|
| T0      | C         | 5.01 ± 0.39 a       | 136.53 ± 10.41 a    | 213.27 ± 5.01 a   | 354.81 ± 10.20 a             |
|         | SA        | 5.43 ± 0.51 a       | 138.24 ± 2.97 a     | 206.13 ± 3.39 a   | 349.80 ± 2.28 a              |
|         | MeSA      | 4.77 ± 0.42 a       | 138.48 ± 5.01 a     | 202.83 ± 16.8 a   | 345.66 ± 20.61 a             |
|         | ASA       | 4.53 ± 0.51 a       | 142.20 ± 7.53 a     | 216.42 ± 15.75 a  | 363.15 ± 16.74 a             |
| 24 h    | C         | 3.96 ± 0.48 a       | 83.79 ± 7.11 a      | 192.72 ± 9.30 a   | 310.47 ± 10.53 a             |
|         | SA        | 3.75 ± 0.90 a       | 142.41 ± 7.44 b     | 250.77 ± 4.23 c   | 396.90 ± 8.91 c              |
|         | MeSA      | 3.72 ± 0.93 a       | 137.04 ± 2.97 ab    | 232.26 ± 3.36 bc  | 373.02 ± 5.40 bc             |
|         | ASA       | 4.26 ± 1.05 a       | 122.16 ± 7.20 ab    | 208.86 ± 10.83 ab | 335.25 ± 17.16 ab            |
| 72 h    | C         | 4.53 ± 0.39 a       | 116.85 ± 3.24 a     | 261.33 ± 14.73 a  | 382.71 ± 17.01 a             |
|         | SA        | 5.01 ± 0.81 a       | 177.57 ± 7.20 b     | 300.33 ± 11.04 ab | 482.85 ± 11.55 b             |
|         | MeSA      | 4.80 ± 0.21 a       | 181.44 ± 12.00 b    | 332.46 ± 12.57 b  | 518.70 ± 21.15 b             |
|         | ASA       | 4.23 ± 0.39 a       | 170.31 ± 13.05 b    | 300.33 ± 11.04 ab | 474.99 ± 13.71 b             |
| 7 days  | C         | 3.57 ± 1.08 a       | 234.27 ± 13.89 ab   | 349.17 ± 11.55 a  | 587.01 ± 12.27 ab            |
|         | SA        | 3.30 ± 0.78 a       | 209.37 ± 17.28 ab   | 378.69 ± 15.09 ab | 591.33 ± 20.34 ab            |
|         | MeSA      | 2.07 ± 1.17 a       | 191.25 ± 8.40 a     | 387.81 ± 5.16 ab  | 581.13 ± 4.98 a              |
|         | ASA       | 3.96 ± 1.11 a       | 244.65 ± 13.89 b    | 399.87 ± 7.80 b   | 648.51 ± 21.87 b             |
| 10 days | C         | 3.06 ± 0.54 a       | 213.72 ± 11.67 a    | 461.49 ± 31.92 a  | 678.24 ± 43.26 a             |
|         | SA        | 2.73 ± 0.57 a       | 190.47 ± 21.09 a    | 459.90 ± 17.52 a  | 653.10 ± 27.99 a             |
|         | MeSA      | 2.94 ± 0.39 a       | 218.64 ± 11.22 a    | 505.41 ± 8.97 a   | 726.96 ± 17.25 a             |
|         | ASA       | 3.18 ± 0.60 a       | 210.09 ± 16.47 a    | 442.32 ± 12.81 a  | 655.56 ± 23.43 a             |

Abbreviations: SA-salicylic acid, MeSA-methyl salicylic acid, ASA-acetyl salicylic acid, C-control, h-hours. Data are presented as average value ± standard error (n = 15).

<sup>a</sup>Different letters in a table denote significant differences among treatments (C, SA, MeSA, ASA) at each time point, calculated by the Tukey test (p < 0.05). <sup>b</sup> Sum of all identified flavanols in strawberries.

Table S4: Content of Identified Flavonols (mg/kg FW) in Salicylic Acid (SA), Methyl Salicylic Acid (MeSA) and Acetyl Salicylic Acid (ASA) Treated Strawberries at Different Time Points (T0, 24 h, 72 h, 7 days and 10 days after treatments with salicylates).

|        | Treatment | Isorhamn<br>hex  | Kaempf-3-<br>coumaroyl glu | Kaempf-3-<br>glucuronide | Kaempf-3-<br>glu | Kaempf-3-<br>rut | Kaempf acetyl<br>hex | Q-3-glu        | Q-3-<br>glucuronide | Q-3-rut           | Q-pent hex    | Total flavonols |
|--------|-----------|------------------|----------------------------|--------------------------|------------------|------------------|----------------------|----------------|---------------------|-------------------|---------------|-----------------|
| T0     | C         | 0.93 ± 0.09<br>a | 1.17 ± 0.06 a              | 1.23 ± 0.30 a            | 0.06 ± 0.00 a    | 0.66 ± 0.03 a    | 1.80 ± 0.42 a        | 2.16 ± 0.24 a  | 1.95 ± 0.30 a       | 1.05 ± 0.30 a     | 0.03 ± 0.00 a | 11.19 ± 1.44 a  |
|        | SA        | 0.72 ± 0.06<br>a | 1.2 ± 0.12 a               | 1.11 ± 0.30 a            | 0.06 ± 0.00 a    | 0.72 ± 0.09 a    | 1.47 ± 0.27 a        | 2.16 ± 0.12 a  | 1.47 ± 0.30 a       | 1.20 ± 1.20 a     | 0.06 ± 0.03 a | 10.23 ± 0.93 a  |
|        | MeSA      | 0.87 ± 0.15<br>a | 0.96 ± 0.09 a              | 1.17 ± 0.33 a            | 0.06 ± 0.00 a    | 0.60 ± 0.12 a    | 1.50 ± 0.48 a        | 1.86 ± 0.27 a  | 1.68 ± 0.45 a       | 1.05 ± 0.30 a     | 0.06 ± 0.03 a | 9.81 ± 1.83 a   |
|        | ASA       | 0.84 ± 0.18<br>a | 1.14 ± 0.09 a              | 1.17 ± 0.48 a            | 0.06 ± 0.03 a    | 0.72 ± 0.15 a    | 1.41 ± 0.54 a        | 2.40 ± 0.24 a  | 1.56 ± 0.45 a       | 1.38 ± 0.42 a     | 0.06 ± 0.03 a | 10.74 ± 2.31 a  |
| 24 h   | C         | 0.45 ± 0.06<br>a | 0.87 ± 0.03 a              | 0.84 ± 0.24 a            | 0.06 ± 0.00 a    | 0.42 ± 0.06 a    | 0.45 ± 0.00 a        | 1.05 ± 0.06 a  | 1.32 ± 0.09 a       | 0.75 ± 0.03 a     | 0.06 ± 0.03 a | 6.21 ± 0.33 a   |
|        | SA        | 0.45 ± 0.09<br>a | 0.96 ± 0.06 a              | 1.59 ± 0.21 a            | 0.06 ± 0.00 a    | 0.07 ± 0.18 a    | 1.14 ± 0.36 ab       | 2.58 ± 0.15 c  | 2.52 ± 0.15 b       | 1.65 ± 0.18 a     | 0.03 ± 0.03 a | 11.70 ± 0.87 b  |
|        | MeSA      | 0.45 ± 0.03<br>a | 0.87 ± 0.09 a              | 0.90 ± 0.21 a            | 0.06 ± 0.00 a    | 0.60 ± 0.06 a    | 1.23 ± 0.15 ab       | 2.25 ± 0.15 bc | 1.74 ± 0.03 a       | 2.76 ± 1.74 a     | 0.03 ± 0.00 a | 10.83 ± 1.50 b  |
|        | ASA       | 0.39 ± 0.09<br>a | 0.78 ± 0.06 a              | 1.11 ± 0.18 a            | 0.06 ± 0.03 a    | 0.51 ± 0.12 a    | 1.68 ± 0.24 b        | 1.86 ± 0.09 b  | 3.24 ± 0.27 c       | 0.93 ± 0.15 a     | 0.03 ± 0.00 a | 10.56 ± 0.57 b  |
| 72 h   | C         | 0.3 ± 0.06 a     | 0.84 ± 0.06 a              | 1.05 ± 0.42 a            | 0.06 ± 0.03 a    | 0.60 ± 0.15 a    | 0.90 ± 0.33 a        | 1.14 ± 0.03 a  | 0.87 ± 0.09 a       | 0.66 ± 0.06 a     | 0.03 ± 0.00 a | 6.39 ± 0.99 a   |
|        | SA        | 0.30 ± 0.00<br>a | 0.99 ± 0.03 a              | 1.05 ± 0.30 a            | 0.09 ± 0.03 a    | 0.63 ± 0.06 a    | 1.44 ± 0.27 a        | 3.24 ± 0.27 b  | 5.04 ± 0.24 d       | 1.08 ± 0.03<br>bc | 0.03 ± 0.00 a | 13.86 ± 0.66 b  |
|        | MeSA      | 0.39 ± 0.06<br>a | 0.99 ± 0.06 a              | 2.04 ± 0.63 a            | 0.12 ± 0.03 a    | 0.96 ± 0.27 a    | 2.52 ± 0.60 a        | 2.91 ± 0.18 b  | 3.66 ± 0.27 c       | 1.32 ± 0.18 c     | 0.03 ± 0.00 a | 14.94 ± 1.68 b  |
|        | ASA       | 0.24 ± 0.03<br>a | 0.96 ± 0.09 a              | 0.87 ± 0.24 a            | 0.06 ± 0.00 a    | 0.48 ± 0.06 a    | 1.20 ± 0.33 a        | 2.61 ± 0.18 b  | 1.86 ± 0.09 b       | 0.87 ± 0.06<br>ab | 0.06 ± 0.03 a | 9.18 ± 0.84 a   |
| 7 days | C         | 0.36 ± 0.12<br>a | 0.75 ± 0.03 a              | 1.02 ± 0.42 a            | 0.06 ± 0.03 a    | 0.69 ± 0.12 a    | 1.38 ± 0.54 a        | 1.68 ± 0.15 a  | 1.41 ± 0.12 a       | 1.11 ± 0.03 a     | 0.03 ± 0.00 a | 8.46 ± 1.20 a   |
|        | SA        | 0.36 ± 0.09<br>a | 0.84 ± 0.06 a              | 1.62 ± 0.54 a            | 0.12 ± 0.03 a    | 0.75 ± 0.15 a    | 2.40 ± 0.87 a        | 3.78 ± 0.42 b  | 4.14 ± 0.42 b       | 1.62 ± 0.09 a     | 0.09 ± 0.03 a | 15.69 ± 2.40 a  |
|        | MeSA      | 0.36 ± 0.12<br>a | 0.81 ± 0.06 a              | 1.59 ± 0.78 a            | 0.09 ± 0.03 a    | 0.72 ± 0.21 a    | 2.16 ± 0.99 a        | 2.79 ± 0.15 ab | 2.34 ± 0.15 a       | 1.59 ± 0.30 a     | 0.03 ± 0.00 a | 12.48 ± 2.52 a  |
|        | ASA       | 0.36 ± 0.06<br>a | 0.87 ± 0.09 a              | 0.87 ± 0.09 a            | 0.12 ± 0.06 a    | 0.75 ± 0.18 a    | 1.59 ± 0.15 a        | 3.42 ± 0.54 b  | 2.16 ± 0.15 a       | 1.74 ± 0.15 a     | 0.09 ± 0.03 a | 12.00 ± 1.08 a  |

(to be continued)

(Continuation of Table S4)

|         | Treatment | Isorhamn<br>hex  | Kaempf-3-<br>coumaroyl glu | Kaempf-3-<br>glucuronide | Kaempf-3-<br>glu | Kaempf-3-<br>rut | Kaempf acetyl<br>hex | Q-3-glu       | Q-3-<br>glucuronide | Q-3-rut       | Q-pent hex    | Total flavonols |
|---------|-----------|------------------|----------------------------|--------------------------|------------------|------------------|----------------------|---------------|---------------------|---------------|---------------|-----------------|
| 10 days | C         | 0.30 ± 0.06<br>a | 0.93 ± 0.12 a              | 0.57 ± 0.24 a            | 0.06 ± 0.03 a    | 0.54 ± 0.15 a    | 0.90 ± 0.30 a        | 3.87 ± 0.99 a | 1.35 ± 0.45 a       | 1.32 ± 0.45 a | 0.12 ± 0.03 a | 9.93 ± 2.64 a   |
|         | SA        | 0.30 ± 0.06<br>a | 0.87 ± 0.06 a              | 0.87 ± 0.15 a            | 0.06 ± 0.00 a    | 0.60 ± 0.09 a    | 1.44 ± 0.27 a        | 2.31 ± 0.36 a | 1.86 ± 0.18 a       | 1.14 ± 0.12 a | 0.06 ± 0.00 a | 9.51 ± 1.35 a   |
|         | MeSA      | 0.33 ± 0.03<br>a | 0.96 ± 0.06 a              | 0.69 ± 0.12 a            | 0.06 ± 0.00 a    | 0.57 ± 0.06 a    | 1.29 ± 0.21 a        | 3.72 ± 0.60 a | 1.83 ± 0.18 a       | 1.32 ± 0.15 a | 0.06 ± 0.03 a | 10.83 ± 1.23 a  |
|         | ASA       | 0.30 ± 0.06<br>a | 0.81 ± 0.09 a              | 1.20 ± 0.36 a            | 0.09 ± 0.00 a    | 0.60 ± 0.09 a    | 1.98 ± 0.54 a        | 2.19 ± 0.24 a | 2.28 ± 0.54 a       | 1.29 ± 0.18 a | 0.06 ± 0.03 a | 10.77 ± 1.86 a  |

Abbreviations: SA-salicylic acid, MeSA-methylsalicylic acid, ASA-acetyl salicylic acid, C-control, h-hours, Isorhamn-isorhamnetin, hex-hexoside, kaempf-kaempferol, glu-glucoside, rut-rutinoside, Q-quercetin, pent-pentoside. Data are presented as average value ± standard error (n = 15). <sup>a</sup>Different letters in a table denote significant differences among treatments (C, SA, MeSA, ASA) at each time point, calculated by the Tukey test (p < 0.05). <sup>b</sup> Sum of all identified flavonols in strawberries.

Table S5: Content of Identified Flavones (mg/kg FW) in Salicylic Acid (SA), Methyl Salicylic Acid (MeSA) and Acetyl Salicylic Acid (ASA) Treated Strawberries at Different Time Points (T0, 24 h, 72 h, 7 days and 10 days after treatments with salicylates).

|         | Treatment | Apig rhamn      | Apig acetyl hex 1 | Apig acetyl hex 2 | Total flavones   |
|---------|-----------|-----------------|-------------------|-------------------|------------------|
| T0      | C         | 5.28 ± 0.36 a   | 11.31 ± 0.69 a    | 97.89 ± 1.26 a    | 114.48 ± 1.80 a  |
|         | SA        | 5.76 ± 0.30 a   | 10.56 ± 1.47 a    | 90.21 ± 1.71 a    | 106.53 ± 2.79 a  |
|         | MeSA      | 5.64 ± 0.54 a   | 11.43 ± 1.23 a    | 92.70 ± 2.10 a    | 109.80 ± 2.46 a  |
|         | ASA       | 5.31 ± 0.66 a   | 10.29 ± 0.96 a    | 96.06 ± 3.39 a    | 112.53 ± 4.74 a  |
| 24 h    | C         | 5.70 ± 0.75 a   | 11.73 ± 0.30 a    | 93.09 ± 1.86 a    | 110.55 ± 2.67 a  |
|         | SA        | 6.00 ± 0.3 a    | 11.13 ± 3.48 a    | 112.41 ± 2.82 b   | 129.54 ± 2.73 b  |
|         | MeSA      | 5.07 ± 0.54 a   | 12.66 ± 0.90 a    | 111.93 ± 4.89 b   | 129.63 ± 5.34 b  |
|         | ASA       | 6.09 ± 0.57 a   | 11.49 ± 0.54 a    | 111.48 ± 3.51 b   | 129.54 ± 3.93 b  |
| 72 h    | C         | 6.6 ± 0.27 a    | 9.99 ± 1.14 a     | 91.56 ± 6.30 a    | 108.15 ± 7.62 a  |
|         | SA        | 7.83 ± 3.39 ab  | 10.68 ± 0.75 a    | 97.89 ± 5.16 a    | 116.40 ± 5.64 a  |
|         | MeSA      | 8.88 ± 0.63 b   | 12.81 ± 1.41 a    | 134.85 ± 11.04 b  | 156.51 ± 12.60 b |
|         | ASA       | 7.05 ± 0.69 ab  | 9.57 ± 0.90 a     | 90.84 ± 5.07 a    | 107.43 ± 5.28 a  |
| 7 days  | C         | 10.89 ± 0.72 a  | 13.71 ± 1.56 a    | 132.27 ± 10.35 a  | 156.87 ± 11.58 a |
|         | SA        | 14.37 ± 1.17 b  | 14.79 ± 2.13 a    | 126.00 ± 11.7 a   | 155.13 ± 13.71 a |
|         | MeSA      | 10.74 ± 0.45 a  | 15.48 ± 2.37 a    | 136.59 ± 5.10 a   | 162.78 ± 7.56 a  |
|         | ASA       | 10.74 ± 0.48 a  | 15.21 ± 0.96 a    | 149.67 ± 9.69 a   | 175.62 ± 10.65 a |
| 10 days | C         | 12.54 ± 0.42 a  | 14.61 ± 1.23 a    | 144.39 ± 9.63 a   | 171.51 ± 10.35 a |
|         | SA        | 14.82 ± 1.38 ab | 15.48 ± 1.41 a    | 161.91 ± 4.62 ab  | 192.21 ± 5.22 ab |
|         | MeSA      | 17.04 ± 1.02 b  | 15.15 ± 0.84 a    | 138.27 ± 2.97 a   | 170.46 ± 4.41 a  |
|         | ASA       | 13.68 ± 0.63 ab | 18.63 ± 2.67 a    | 186.72 ± 6.36 b   | 219.03 ± 7.89 b  |

Abbreviations: SA-salicylic acid, MeSA-methyl salicylic acid, ASA-acetyl salicylic acid, C-control, h-hours, apig-apigenin, hex-hexoside. Data are presented as average value ± standard error (n = 15). <sup>a</sup>Different letters in a table denote significant differences among treatments (C, SA, MeSA, ASA) at each time point, calculated by the Tukey test (p < 0.05). <sup>b</sup> Sum of all identified flavones in strawberries.

Table S6: Content of Identified Antocyanins (mg/kg FW) in Salicylic Acid (SA), Methyl Salicylic Acid (MeSA) and Acetyl Salicylic Acid (ASA) Treated Strawberries at Different Time Points (T0, 24 h, 72 h, 7 days and 10 days after treatments with salicylates).

|         | Treatment | Cy-3-glu       | Pel-3-glu        | Pel-3-rut      | Cy-3-malonylglu | Pel-3-malonylglu | Total anthocyanins |
|---------|-----------|----------------|------------------|----------------|-----------------|------------------|--------------------|
| T0      | C         | 9.33 ± 0.66 a  | 288.27 ± 7.86 a  | 11.01 ± 0.45 a | 3.39 ± 0.27 a   | 72.66 ± 4.59 a   | 386.73 ± 8.37 a    |
|         | SA        | 9.06 ± 0.78 a  | 300.09 ± 11.16 a | 11.16 ± 0.39 a | 3.33 ± 0.51 a   | 66.09 ± 4.89 a   | 392.07 ± 13.62 a   |
|         | MeSA      | 10.05 ± 1.32 a | 299.94 ± 10.20 a | 11.28 ± 0.63 a | 4.26 ± 1.20 a   | 78.57 ± 6.42 a   | 406.50 ± 16.20 a   |
|         | ASA       | 7.89 ± 1.08 a  | 282.51 ± 8.34 a  | 10.29 ± 0.66 a | 3.00 ± 0.57 a   | 67.95 ± 3.69 a   | 373.5 ± 12.09 a    |
| 24 h    | C         | 7.26 ± 0.75 a  | 228.63 ± 1.56 a  | 5.16 ± 0.33 a  | 2.64 ± 0.33 a   | 54.00 ± 1.44 a   | 298.80 ± 2.37 a    |
|         | SA        | 10.68 ± 0.39 b | 338.7 ± 7.53 c   | 12.24 ± 0.12 c | 3.21 ± 0.30 a   | 82.56 ± 2.49 b   | 450.06 ± 7.59 d    |
|         | MeSA      | 7.26 ± 0.75 a  | 256.23 ± 4.62 b  | 6.93 ± 0.93 ab | 2.64 ± 0.33 a   | 59.40 ± 2.97 a   | 333.60 ± 6.42 b    |
|         | ASA       | 8.43 ± 0.3 ab  | 277.05 ± 6.84 b  | 8.31 ± 0.33 b  | 3.06 ± 0.51 a   | 72.51 ± 2.85 b   | 372.03 ± 9.54 c    |
| 72 h    | C         | 9.03 ± 1.14 a  | 262.95 ± 3 a     | 12.24 ± 1.11 a | 4.83 ± 1.29 a   | 60.57 ± 3.96 a   | 352.83 ± 8.16 a    |
|         | SA        | 12.39 ± 0.39 a | 330.69 ± 7.53 b  | 14.22 ± 0.27 a | 5.16 ± 0.33 a   | 71.19 ± 6.24 a   | 436.83 ± 14.25 bc  |
|         | MeSA      | 10.26 ± 0.81 a | 345.39 ± 9.18 b  | 15.96 ± 1.29 a | 6.54 ± 1.68 a   | 88.53 ± 9.93 a   | 469.83 ± 14.25 c   |
|         | ASA       | 11.49 ± 0.9 a  | 290.28 ± 7.2 a   | 12.93 ± 1.26 a | 6.03 ± 2.58 a   | 67.62 ± 7.14 a   | 392.91 ± 12.27 ab  |
| 7 days  | C         | 15.42 ± 1.11 a | 402.63 ± 6.36 a  | 20.91 ± 0.72 a | 7.38 ± 0.30 a   | 90.81 ± 12.69 a  | 542.28 ± 15.75 a   |
|         | SA        | 13.95 ± 1.89 a | 463.74 ± 10.83 b | 21.66 ± 1.44 a | 8.07 ± 1.26 a   | 95.97 ± 7.23 a   | 608.91 ± 16.56 ab  |
|         | MeSA      | 13.68 ± 2.7 a  | 471.18 ± 19.26 b | 19.59 ± 1.59 a | 6.15 ± 0.69 a   | 114.87 ± 15.21 a | 630.15 ± 34.14 b   |
|         | ASA       | 16.08 ± 1.83 a | 465.96 ± 11.37 b | 19.41 ± 0.93 a | 6.99 ± 1.20 a   | 89.94 ± 10.02 a  | 602.97 ± 7.23 ab   |
| 10 days | C         | 14.7 ± 0.75 a  | 395.64 ± 7.68 a  | 20.40 ± 2.07 a | 7.41 ± 1.95 a   | 86.01 ± 7.68 a   | 529.32 ± 12.57 a   |
|         | SA        | 15.36 ± 1.17 a | 475.32 ± 14.94 b | 16.38 ± 1.95 a | 5.58 ± 0.72 a   | 139.14 ± 8.34 bc | 655.95 ± 15.78 b   |
|         | MeSA      | 17.88 ± 0.39 a | 481.83 ± 13.14 b | 21.48 ± 1.47 a | 8.25 ± 0.63 a   | 109.08 ± 9.96 ab | 644.13 ± 10.08 b   |
|         | ASA       | 14.19 ± 1.77 a | 487.95 ± 22.41 b | 16.95 ± 0.84 a | 6.30 ± 0.93 a   | 147.42 ± 9.96 c  | 678.36 ± 35.25 b   |

Abbreviations: SA-salicylic acid, MeSA-methyl salicylic acid, ASA-acetyl salicylic acid, C-control, h-hours, Cy-cyanidin, glu-glucoside, pel-pelargonidin, rut-rutinoside.

Data are presented as average value ± standard error (n = 15). <sup>a</sup>Different letters in a table denote significant differences among treatments (C, SA, MeSA, ASA) at each time point, calculated by the Tukey test (p < 0.05). <sup>b</sup> Sum of all identified anthocyanins in strawberries.

Table S7: Content of Identified Flavanones (mg/kg FW) in Salicylic Acid (SA), Methyl Salicylic Acid (MeSA) and Acetyl Salicylic Acid (ASA) Treated Strawberries at Different Time Points (T0, 24 h, 72 h, 7 days and 10 days after treatments with salicylates).

|         | Treatment | Eriodictyol acetyl hex | Naringenin hex | Total flavanones |
|---------|-----------|------------------------|----------------|------------------|
| T0      | C         | 1.11 ± 0.09 a          | 0.06 ± 0.00 a  | 1.14 ± 0.09 a    |
|         | SA        | 0.87 ± 0.09 a          | 0.06 ± 0.00 a  | 1.08 ± 0.21 a    |
|         | MeSA      | 1.14 ± 0.18 a          | 0.09 ± 0.00 a  | 1.23 ± 0.18 a    |
|         | ASA       | 0.90 ± 0.09 a          | 0.09 ± 0.03 a  | 0.99 ± 0.15 a    |
| 24 h    | C         | 1.20 ± 0.15 a          | 0.06 ± 0.03 a  | 1.26 ± 0.12 a    |
|         | SA        | 1.02 ± 0.18 a          | 0.03 ± 0.00 a  | 1.05 ± 0.18 a    |
|         | MeSA      | 1.29 ± 0.12 a          | 0.03 ± 0.00 a  | 1.32 ± 0.12 a    |
|         | ASA       | 1.17 ± 0.18 a          | 0.03 ± 0.00 a  | 1.20 ± 0.18 a    |
| 72 h    | C         | 1.05 ± 0.12 a          | 0.03 ± 0.00 a  | 1.08 ± 0.12 a    |
|         | SA        | 1.11 ± 0.15 a          | 0.03 ± 0.00 a  | 1.14 ± 0.15 a    |
|         | MeSA      | 1.38 ± 0.21 a          | 0.03 ± 0.00 a  | 1.41 ± 0.18 a    |
|         | ASA       | 1.02 ± 0.15 a          | 0.03 ± 0.00 a  | 1.05 ± 0.15 a    |
| 7 days  | C         | 1.74 ± 0.27 a          | 0.03 ± 0.00 a  | 1.74 ± 0.27 a    |
|         | SA        | 1.92 ± 0.39 a          | 0.03 ± 0.00 a  | 1.92 ± 0.39 a    |
|         | MeSA      | 2.04 ± 0.39 a          | 0.03 ± 0.00 a  | 2.04 ± 0.39 a    |
|         | ASA       | 1.95 ± 0.18 a          | 0.03 ± 0.00 a  | 1.98 ± 0.18 a    |
| 10 days | C         | 1.74 ± 0.24 a          | 0.03 ± 0.00 a  | 1.77 ± 0.24 a    |
|         | SA        | 2.01 ± 0.21 a          | 0.03 ± 0.00 a  | 2.01 ± 0.21 a    |
|         | MeSA      | 1.86 ± 0.24 a          | 0.03 ± 0.00 a  | 1.86 ± 0.24 a    |
|         | ASA       | 2.67 ± 0.48 a          | 0.03 ± 0.00 a  | 2.70 ± 0.48 a    |

Abbreviations: SA-salicylic acid, MeSA-methyl salicylic acid, ASA-acetyl salicylic acid, C-control, h-hours, hex-hexoside. Data are presented as average value ± standard error (n = 15). <sup>a</sup>Different letters in a table denote significant differences among treatments (C, SA, MeSA, ASA) at each time point, calculated by the Tukey test (p < 0.05). <sup>b</sup> Sum of all identified flavanones in strawberries.



Table S8: Content of Identified Ellagic Acid Derivatives (mg/kg FW) in Salicylic Acid (SA), Methyl Salicylic Acid (MeSA) and Acetyl Salicylic Acid (ASA) Treated Strawberries at Different Time Points (T0, 24 h, 72 h, 7 days and 10 days after treatments with salicylates).

|         | Treatment | bis HHDP<br>hexose 1 | bis HHDP<br>hexose 2 | Ellag acid pent<br>1 | Ellag acid pent 2 | Ellag acid hex   | Ellag acid<br>deoxy hex | Ellag acid<br>rhamn | Total ellag acid derivat |
|---------|-----------|----------------------|----------------------|----------------------|-------------------|------------------|-------------------------|---------------------|--------------------------|
| T0      | C         | 10.65 ± 2.61 a       | 24.63 ± 2.16 a       | 7.23 ± 0.36 a        | 1.89 ± 0.39 a     | 68.16 ± 3.18 a   | 0.21 ± 0.06 a           | 0.63 ± 0.15 a       | 116.37 ± 7.35 a          |
|         | SA        | 10.86 ± 1.53 a       | 29.91 ± 2.88 a       | 6.54 ± 0.36 a        | 1.83 ± 0.42 a     | 67.68 ± 5.85 a   | 0.30 ± 0.09 a           | 0.45 ± 0.09 a       | 117.54 ± 8.43 a          |
|         | MeSA      | 12.48 ± 1.38 a       | 26.37 ± 2.34 a       | 7.68 ± 0.84 a        | 2.31 ± 0.90 a     | 68.31 ± 1.98 a   | 0.66 ± 0.36 a           | 0.84 ± 0.21 a       | 118.65 ± 6.00 a          |
|         | ASA       | 9.72 ± 1.29 a        | 24.87 ± 2.88 a       | 6.69 ± 1.05 a        | 1.68 ± 0.36 a     | 62.34 ± 3.15 a   | 0.66 ± 0.24 a           | 1.08 ± 0.63 a       | 107.04 ± 7.98 a          |
| 24 h    | C         | 10.92 ± 0.84 a       | 21.84 ± 2.64 a       | 7.62 ± 0.93 a        | 1.77 ± 0.09 a     | 75.72 ± 6.15 a   | 0.27 ± 0.06 a           | 0.57 ± 0.33 a       | 115.68 ± 9.18 a          |
|         | SA        | 9.33 ± 1.44 a        | 20.58 ± 5.04 a       | 7.02 ± 0.42 a        | 1.77 ± 0.45 a     | 72.33 ± 4.08 a   | 0.45 ± 0.24 a           | 0.30 ± 0.12 a       | 111.81 ± 10.83 a         |
|         | MeSA      | 10.26 ± 1.71 a       | 20.46 ± 5.13 a       | 6.63 ± 0.48 a        | 1.11 ± 0.33 a     | 77.04 ± 4.35 a   | 0.30 ± 0.06 a           | 0.21 ± 0.09 a       | 115.98 ± 7.74 a          |
|         | ASA       | 10.8 ± 2.82 a        | 23.43 ± 5.76 a       | 6.45 ± 0.51 a        | 1.17 ± 0.30 a     | 69.33 ± 6.33 a   | 0.15 ± 0.06 a           | 0.18 ± 0.06 a       | 111.39 ± 14.88 a         |
| 72 h    | C         | 11.52 ± 2.46 a       | 24.99 ± 2.4 a        | 7.14 ± 0.69 ab       | 0.66 ± 0.18 a     | 81.84 ± 6.51 a   | 0.18 ± 0.06 a           | 0.12 ± 0.03 a       | 126.36 ± 11.76 a         |
|         | SA        | 10.02 ± 0.57 a       | 27.33 ± 4.5 a        | 8.58 ± 0.54 ab       | 1.35 ± 0.24 a     | 88.77 ± 3.12 a   | 0.18 ± 0.03 a           | 0.18 ± 0.03 a       | 136.44 ± 3.36 a          |
|         | MeSA      | 10.20 ± 1.59 a       | 26.37 ± 1.23 a       | 9.60 ± 0.81 b        | 1.29 ± 0.36 a     | 102.75 ± 6.93 a  | 0.27 ± 0.09 a           | 0.24 ± 0.09 a       | 150.72 ± 8.67 a          |
|         | ASA       | 8.67 ± 2.01 a        | 23.22 ± 2.25 a       | 6.87 ± 0.33 a        | 0.60 ± 0.03 a     | 82.02 ± 4.95 a   | 0.15 ± 0.03 a           | 0.18 ± 0.06 a       | 121.77 ± 8.16 a          |
| 7 days  | C         | 10.59 ± 1.26 a       | 19.68 ± 5.91 a       | 11.49 ± 0.42 a       | 1.29 ± 0.33 a     | 137.28 ± 9.54 a  | 0.45 ± 0.12 a           | 0.15 ± 0.03 a       | 180.93 ± 14.07 a         |
|         | SA        | 8.40 ± 0.75 a        | 18.15 ± 4.35 a       | 12.87 ± 1.23 a       | 1.80 ± 0.6 a      | 127.41 ± 11.61 a | 0.36 ± 0.06 a           | 0.09 ± 0.03 a       | 169.11 ± 14.46 a         |
|         | MeSA      | 8.94 ± 0.84 a        | 11.43 ± 6.48 a       | 12.42 ± 1.05 a       | 0.84 ± 0.06 a     | 122.01 ± 4.98 a  | 0.39 ± 0.09 a           | 0.21 ± 0.09 a       | 156.21 ± 10.68 a         |
|         | ASA       | 9.09 ± 0.57 a        | 21.87 ± 6.12 a       | 12.87 ± 1.38 a       | 1.50 ± 0.54 a     | 129.54 ± 4.23 a  | 0.3 ± 0.06 a            | 0.30 ± 0.09 a       | 175.47 ± 9.42 a          |
| 10 days | C         | 4.77 ± 1.17 a        | 16.83 ± 2.97 a       | 12.27 ± 0.93 a       | 1.23 ± 0.36 a     | 132.69 ± 5.55 a  | 0.42 ± 0.12 a           | 0.18 ± 0.09 a       | 168.39 ± 5.67 a          |
|         | SA        | 7.77 ± 1.08 a        | 14.97 ± 3.15 a       | 10.77 ± 0.99 a       | 0.99 ± 0.18 a     | 126.12 ± 3.36 a  | 0.39 ± 0.06 a           | 0.15 ± 0.03 a       | 161.16 ± 6.33 a          |
|         | MeSA      | 6.51 ± 1.17 a        | 16.20 ± 2.22 a       | 12.24 ± 0.36 a       | 1.44 ± 0.57 a     | 131.28 ± 8.37 a  | 0.39 ± 0.12 a           | 0.12 ± 0.03 a       | 168.15 ± 11.37 a         |
|         | ASA       | 6.24 ± 1.05 a        | 17.52 ± 3.24 a       | 11.82 ± 1.02 a       | 0.75 ± 0.06 a     | 134.25 ± 9.36 a  | 0.27 ± 0.03 a           | 0.12 ± 0.06 a       | 170.97 ± 14.22 a         |

Abbreviations: SA-salicylic acid, MeSA-methyl salicylic acid, ASA-acetyl salicylic acid, C-control, h-hours, HHDP- hexahydroxydiphenic acid, ellag-ellagic, pent-pentoside, hex-hexoside, rhamn-rhamnoside, derivat-derivative . Data are presented as average value ± standard error (n = 15). <sup>a</sup>Different letters in a table denote significant differences among treatments (C, SA, MeSA, ASA) at each time point, calculated by the Tukey test (p < 0.05). <sup>b</sup> Sum of all identified ellagic acid derivatives in strawberries.
